# Supplementary material for: Generic microfluidic platform for digital droplet-based bioassays
Source: Royal Society of Chemistry journal article supplement (doi:10.1039/d6ra02395a), 2026-05-22
Supplement: d6ra02395a3.zip [file Readme.pdf › stepEmuV3ScaledFixedInletPressureTemplate/constant/triSurface/Readme.pdf]

# README

**Author:** Thomas Henkel<[thomas.henkel@leibniz-ipht.de](mailto:thomas.henkel@leibniz-ipht.de)>

**Created:** 2026-03-19

**Case:** stepEmuV2ScaledFixedInletPressureTemplate

**SubDir:** constant/triSurface

**OpenFoamSolver:** interFoam

**OpenFoamVersion:** OpenFoam2406

The original geometry source files are in the ParametersAndScaling Subfolder

## Files

| FileName            | Note                                                            |
|---------------------|-----------------------------------------------------------------|
| channel.eMesh       | The eMesh, generated by open foam / snappyHexMesh.              |
| channel.stl         | the utilized input stl geometry.(A copy of stepEmuV3Scaled.stl) |
| Readme.txt          | This File.                                                      |
| stepEmuV3Scaled.msh | The original gmesh mesh of the DG_UNIT                          |
| stepEmuV3Scaled.stl | The original stl file of the DG_UNIT                            |
