# Supplementary material for: Generic microfluidic platform for digital droplet-based bioassays
Source: Royal Society of Chemistry journal article supplement (doi:10.1039/d6ra02395a), 2026-05-22
Supplement: d6ra02395a3.zip [file Readme.pdf › stepEmuV3ScaledFixedInletPressureTemplate/postprocessing/Readme.pdf]

# README

**Author:** Thomas Henkel<[thomas.henkel@leibniz-ipht.de](mailto:thomas.henkel@leibniz-ipht.de)>

**Created:** 2026-03-19

**Case:** stepEmuV2ScaledFixedInletPressureTemplate

**SubDir:** /postprocessing

**OpenFoamSolver:** interFoam

**OpenFoamVersion:** OpenFoam2406

## Usage

Folder and templates for postprocessing and rendering of the simulation results. Launch *paraFoam* after running *openfoam2406* and load the state file *postprocessing-state.pvsm* from the menu */File/LoadState*. Maybe that some of the paths need to be customized according the location of your simulation on the file system of your computer.

## Folders and Files

| FileName                  | Note                                                            |
|---------------------------|-----------------------------------------------------------------|
| postprocessing-state.pvsm | The paraview state file for visualizing the simulation results. |
| pp-state_Screenshot.png   | The screenshot of the para view showing the simulation data.    |
| Readme.txt                | This file                                                       |
