# Supplementary material for: Generic microfluidic platform for digital droplet-based bioassays
Source: Royal Society of Chemistry journal article supplement (doi:10.1039/d6ra02395a), 2026-05-22
Supplement: d6ra02395a3.zip [file ReadmeCFDSimTemplate.pdf › ReadmeCFDSimTemplate.pdf]

# README

**Author:** Thomas Henkel<[thomas.henkel@leibniz-ipht.de](mailto:thomas.henkel@leibniz-ipht.de)>

**Created:** 2026-03-19

**Case:** stepEmuV2ScaledFixedInletPressureTemplate

**SubDir:** /

**OpenFoamSolver:** interFoam

**OpenFoamVersion:** OpenFoam2406

## Usage

For running the simulation customize the settings and run scripts, initialize the openFoam environment by running the *openfoam2406* script from the shell and proceed with the target run script.

**Technical Hint:** When starting the simulation the interface geometries are very coarse and must slowly converge to the real geometries and target contact angles. This must be forced by running the first stage of the simulation at very low time step size which can be limited in the system/controlDict dictionary by setting the maxDeltaT value to 1E-10 and increase it successively after some iterations.

## Folders and Files

| FileName             | Note                                                           |
|----------------------|----------------------------------------------------------------|
| 0.orig               | Original data for the time step 0 with the initial values      |
| Allclean             | The Allclean Script of the simulation                          |
| Allrun               | The Allrun Script of the simulaiton                            |
| Allrun-parallel      | The Allrun script for a parallel run                           |
| AllToVTK             | Conversion of the Simulation data to VTK legacy format         |
| constant             | The constant subfolder of the OpenFoam case                    |
| ParametersAndScaling | The folder holing the utilized parameters and scaling rules    |
| Readme.txt           | This File                                                      |
| system               | The system subfolder of the OpenFoam case                      |
| VTK_RESULTS_SELECTED | A selection of VTK Datasets from the published simulation run. |
| postprocessing       | paraview state files for postprocessing                        |
